# Supplementary material for: Extractive electrospray ionization mass spectrometry for sensitive detection of gaseous radioactive iodine-129
Source: Royal Society of Chemistry journal article supplement (doi:10.1039/c3ja00011g), 2013-01-01
Supplement: c3ja00011g.pdf [file c3ja00011g.pdf]

## **Extractive electrospray ionization mass spectrometry for sensitive detection of radioactive iodine-129**

Zhongchen Wu<sup>aξ</sup>, Yafei Zhou<sup>bξ</sup>, Ning Xu<sup>b</sup>, Lin Tao<sup>a</sup> and Huanwen Chen<sup>b\*</sup>

- a College of Space Science and Physics, Shandong University, Weihai, Shandong Province 264209, China
- b Jiangxi Key Laboratory for Mass Spectrometry and Instrumentation, East China Institute of Technology, Nanchang, Jiangxi Province 330013, China

Prepared for *JAAS*

\*Corresponding authors: chw8868@gmail.com (H. Chen);

Fax: +86-791-83896370

# **Supporting Information**

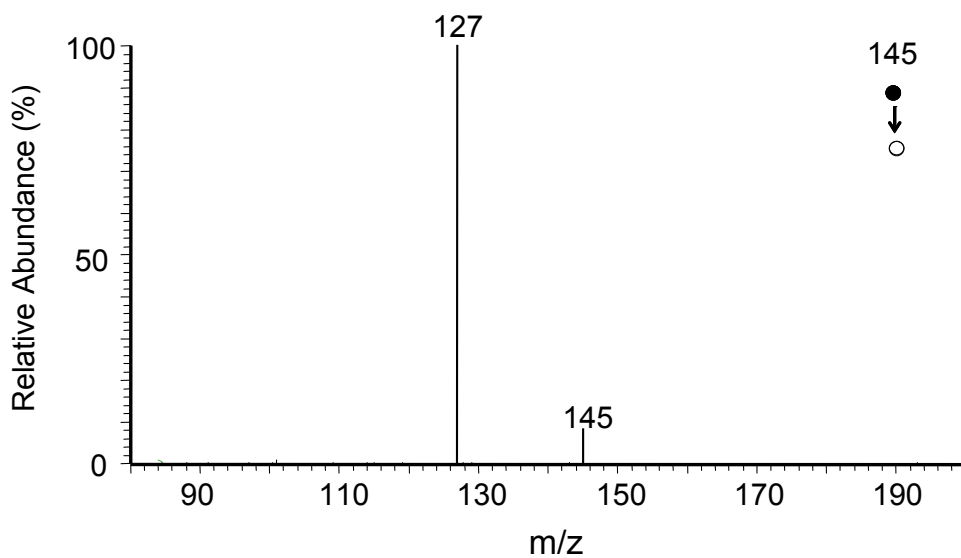

**Fig. S1 MS/MS spectrum of m/z 145 ions [127I+H<sub>2</sub>O]-**

**(30% collision energy, 70 ms)**

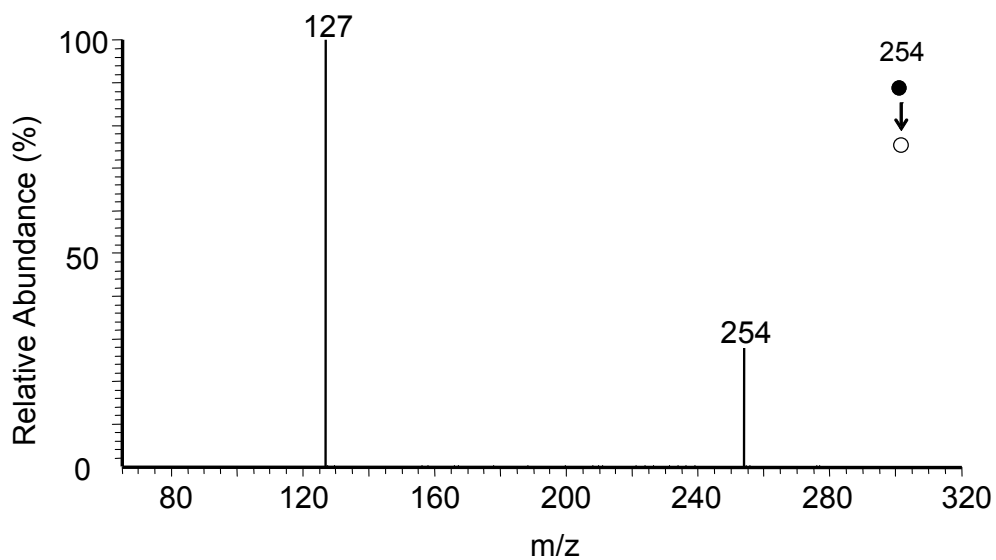

**Fig. S2 MS/MS spectrum of m/z 254 ions <sup>127</sup>I<sub>2</sub><sup>-</sup>.**

**(30% collision energy, 70 ms)**
